# Supplementary material
Source: Springer Nature journal article supplement (https://www.springermedizin.de/resource/supplementary/12887_2006_158_MOESM1_ESM.pdf/9477392)

**Baseline - 29.5% Wz**

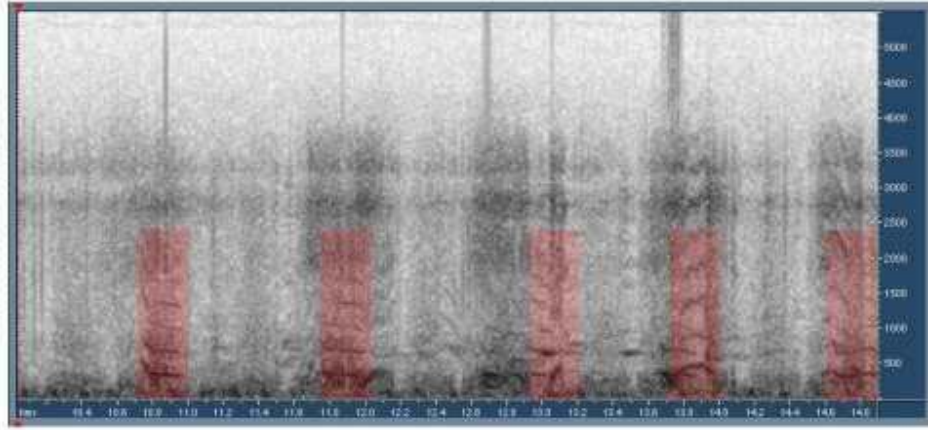

**After 10 min - 15.2% Wz**

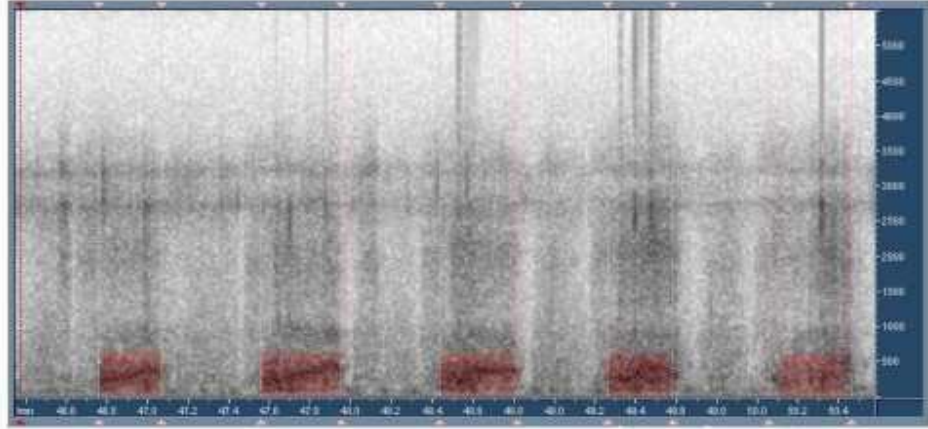

**After 30 min - 38.9% Wz**

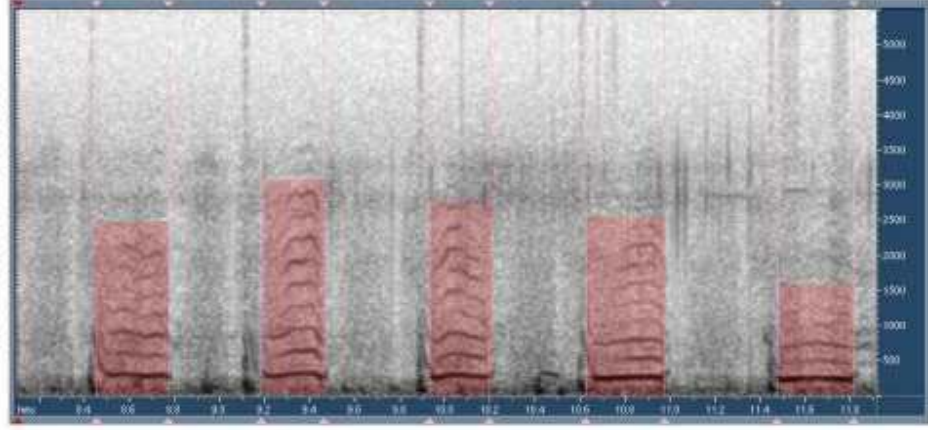

Supplement: MOESM1 [file 9477392]
